# Supplementary material
Source: Springer Nature journal article supplement (https://www.springermedizin.de/resource/supplementary/13020_2011_153_MOESM1_ESM.PDF/9641088)
Supplement: MOESM1 [file 9641088]

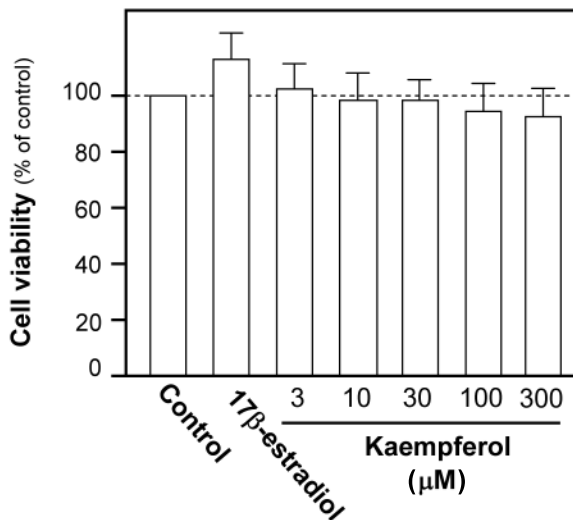

**Supplementary Figure 1:** Treatment of kaempferol did not affect the cell viability of cultured osteoblasts. Cultured osteoblasts were challenged with 17β-estradiol (10 nM), or different doses of kaempferol for 2 days, and the cell viability was determined by MTT assay. Values are expressed as the % of the control reading (control culture treated with 0.02% DMSO), and are in mean  $\pm$  SD, where  $n=4$ , each with triplicate samples.
